# Supplementary material
Source: PubMed Central journal article supplement (PMC3501132)
Supplement: NIHMS353197-supplement-1.pdf [file NIHMS353197-supplement-1.pdf]

## Supplementary Information

### Experimental procedures for the synthesis of QDA and \*QDA

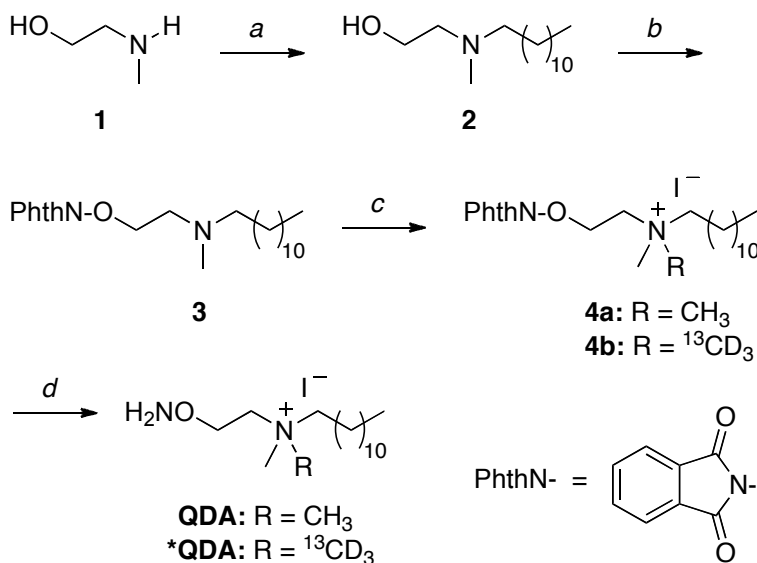

**Scheme S1.** Synthetic scheme for QDA and \*QDA. Reagents, conditions, and yields are as follows (a) 1-bromododecane (1.0 eq), anhydrous sodium carbonate (1.0 eq), ethanol, reflux, 20 h; 70%; (b) *N*-hydroxyphthalimide (1.1 eq), PPh<sub>3</sub> (1.1 eq), DIAD (1.1 eq), THF, rt, 12 h; 98%; (c) CH<sub>3</sub>I or <sup>13</sup>CD<sub>3</sub>I (2.5 eq), CH<sub>2</sub>Cl<sub>2</sub>, 50 °C, 12 h; (d) hydrazine monohydrate (5.0 eq), anhydrous ethanol, rt (for QDA) or 50 °C (for \*QDA), 12 h; 65-75% (2 steps), respectively.

### Materials and Methods

*N,N*-dimethylethanolamine (95.5%), 1-bromododecane (97%), *N*-hydroxyphthalimide (97%), triphenylphosphine (reagent plus, 99%), diisopropyl azodicarboxylate (DIAD, 95%), 1-iodooctane (98%), hydrazine hydrate, iodomethane (99%), sodium  $\alpha$ -ketoglutarate, oxaloacetic acid, sodium  $\alpha$ -ketobutanic acid, sodium pyruvate, *n*-butanol (99.9%) and anhydrous ethanol (200 proof, 99.5%) were purchased from Aldrich Chemical Company (Milwaukee, WI). Reagent grade ACS dichloromethane (DCM), tetrahydrofuran (THF), acetone, hexanes, and ethyl acetate were purchased from Pharmco-AAPER (Shelbyville, Ky).  $\alpha$ -D(+)-glucose was purchased from Acros Organics. THF and DCM were dried using a solvent purification system by LC Technology Solutions, Inc. (Salisbury, MA). CDCl<sub>3</sub> (99.8%) was purchased from Cambridge Isotope Laboratories (Andover, Ma.). NMR spectra were acquired on a Varian *Inova* 500 MHz spectrometer. FTIR spectra were acquired on a Mattson galaxy series 5000 DRIFT

spectrometer using 64 scans, at a scan speed of 2.1 kHz and a resolution of 4v. DRIFT samples were prepared as a loose powder in KBr. FTMS spectra were acquired on a Finnigan LTQ- FT spectrometer (Thermo Electron Corp.). Heating of samples was done on a Barnstead/Thermolyne Type 17600 Dri-bath. Centrifugation was performed on an Eppendorf Centrifuge type 5415R; vacuum centrifugation was performed on an Eppendorf Vacufuge. Melting points were acquired on an SRS Digimelt.

*Synthesis of N-(2-hydroxyethyl)-N-methyl-1-dodecylamine (2).* A solution of 2-(methylamino)ethanol (1.37 mL, 17.0 mmol), 1-bromododecane (4.08 mL, 17.0 mmol), and anhydrous sodium carbonate (1.93 g, 17.0 mmol) in anhydrous ethanol (34 mL) was heated to reflux. After 20h, the reaction suspension was cooled to room temperature and the precipitated solids were removed by filtration. The filtrate was concentrated to one-third volume by rotary evaporation and then transferred to a centrifuge vial and centrifuged to pellet precipitated solids. The supernatant was collected and evaporated by rotary evaporation. Bulb-to-bulb distillation (Kugelrohr, 190 °C, ca. -0.986 atm) of the crude residue afforded **2** (2.91 g, 70%) as a clear liquid. Spectral characterization of **2** gave values identical to those reported;<sup>1</sup> <sup>1</sup>H NMR (500 MHz, CDCl<sub>3</sub>) δ 0.88 (t, *J* = 6.0 Hz, 3H, C(12)H<sub>3</sub>); 1.25 (m, 18H, C(3-11)H<sub>2</sub>); 1.45 (m, 2H, C(2)H<sub>2</sub>), 2.22 (s, 3H, N(CH<sub>3</sub>)); 2.38 (t, *J* = 8.50 Hz, 2H, C(1)H<sub>2</sub>); 2.50 (t, *J* = 4.25 Hz, C(1')H<sub>2</sub>); 3.57 (t, *J* = 5.5 Hz, 2H, C(2')H<sub>2</sub>).

*Synthesis of 2-(2-(dodecyl(methyl)amino)ethoxy)isoindoline-1,3-dione (3).* To a solution of **2** (2.91 g, 11.9 mmol) in THF (50 mL) at 0 °C were added *N*-hydroxyphthalimide (2.14 g, 13.1 mmol), PPh<sub>3</sub> (3.44 g, 13.1 mmol) and DIAD (2.6 mL, 13.1 mmol). The reaction mixture was warmed to room temperature and stirred 12h before removing the solvents by rotary evaporation. To the yellow residue was added hexane (60 mL) and the resultant suspension was triturated and sonicated (room temperature bath, 30 sec intervals). The resultant fine solids were removed by filtration, and the filtrate was removed by rotary evaporation to afford crude **3** as an orange solid. The crude product was dissolved in ethyl acetate (50 mL) and the solution was washed with saturated NaHCO<sub>3</sub> (3X). The organic layer was dried (Na<sub>2</sub>SO<sub>4</sub>) and then evaporated by rotary evaporation to yield **3** (4.53 g, 98%) as a yellow, low melting semi-solid (38.7-40.1 °C); <sup>1</sup>H NMR (500 MHz, CDCl<sub>3</sub>) δ 0.87 (t, *J* = 7.0 Hz, 3H, C(12)H<sub>3</sub>); 1.24 (m, 18H, C(3-11)H<sub>2</sub>); 1.41 (m, 2H, C(2)H<sub>2</sub>); 2.29 (s, 3H, NCH<sub>3</sub>); 2.39 (t, *J* = 7.8 Hz, 2H, C(1)H<sub>2</sub>); 2.83 (t, *J* = 5.5 Hz, 2H, C(1')H<sub>2</sub>); 4.32 (t, *J* = 5.5 Hz, 2H, C(2')H<sub>2</sub>); 7.74 (m, 2H); 7.83 (m, 2H). <sup>13</sup>C-NMR (125 MHz, CDCl<sub>3</sub>) 19C δ 14.1; 21.9; 22.6; 26.9; 27.4; 29.3; 29.5-29.6 (m); 31.9; 42.1; 55.4; 57.8; 75.6; 123.4; 128.9; 134.4; 163.4.

*Synthesis of N-[2-(Aminoxy)ethyl]-N, N-dimethyl-1-dodecylammonium iodide (QDA).* A glass pressure tube was charged with **3** (0.10 g, 1.79 mmol), dry CH<sub>2</sub>Cl<sub>2</sub> (5 mL) and iodomethane (1.53 g 10.8 mmol). The tube was sealed and then immersed in an oil bath heated to 50 °C. After 12h, the reaction was cooled to room temperature, the tube was opened and the solvent was evaporated in a fume hood using a steady nitrogen stream. The resulting off-white solid was used directly in the next step. **4a**: <sup>1</sup>H NMR (500 MHz, CDCl<sub>3</sub>) δ 0.85 (t, *J* = 7.0 Hz, 3H, C(12)H<sub>3</sub>); 1.24 (m, 16H, C(4-11)H<sub>2</sub>); 1.36 (m, 2H, C(3)H<sub>2</sub>); 1.84 (m, 2H, C(2)H<sub>2</sub>); 3.56 (s, 6H, NCH<sub>3</sub>); 3.77 (m, 2H, C(1)H<sub>2</sub>); 4.37 (t, *J* = 4.3 Hz, 2H, C(1')H<sub>2</sub>); 4.75 (t, *J* = 4.0 Hz, 2H, C(2')H<sub>2</sub>); 7.80 (m, 2H); 7.85 (m, 2H).

To a solution of **4a** (0.90 g, 1.70 mmol) in dry ethanol (9 mL) hydrazine monohydrate (0.43 g 8.49 mmol) was added. The reaction mixture was stirred at room temperature 12h whereupon the solvent was removed by rotary evaporation. To the residue was added CH<sub>2</sub>Cl<sub>2</sub> (20 mL) and the resultant suspension was filtered. The filtrate was concentrated by rotary evaporation and toluene (15 mL) was added. The mixture was triturated with sonication (room temperature bath, 30 sec intervals) and the solids were collected and dried (vacuum) to afford **QDA** (0.45 g, 65%); mp 85.9-88.9 °C; <sup>1</sup>H-NMR (500 MHz, CDCl<sub>3</sub>) δ 0.87 (t, *J* = 7.0 Hz, 3H, C(12)H<sub>3</sub>); 1.20-1.43 (m, 18H, C(3-11)H<sub>2</sub>); 1.75 (m, 2H, C(2)H<sub>2</sub>); 3.42 (s, 6H, NCH<sub>3</sub>); 3.58 (m, 2H, C(1)H<sub>2</sub>); 3.96 (t, *J* = 4.5 Hz, 2H, C(1')H<sub>2</sub>); 4.16 (m, 2H, C(2')H<sub>2</sub>); 6.85 (br. s, 2H, NH<sub>2</sub>); <sup>13</sup>C NMR (125 MHz, CDCl<sub>3</sub>) δ 14.1; 22.6; 22.9; 26.2; 29.2; 29.3; 29.35; 29.4; 29.6 (2 signals); 31.9; 52.1; 62.4; 66.0; 68.9; IR (DRIFT, KBr powder) 3270, 2917, 2848, 1468, 1172, 956, 900 cm<sup>-1</sup>; HRMS *m/z* calcd [C<sub>16</sub>H<sub>37</sub>N<sub>2</sub>O]<sup>+</sup> 273.2906, observed 273.2903.

*Synthesis of N-[2-(Aminoxy)ethyl]-N-methyl-N-[(<sup>13</sup>C<sup>2</sup>H<sub>3</sub>)-methyl]-1-dodecylammonium iodide (\*QDA).* Using the procedure described above for the synthesis of **QDA**, amine **3** (0.50 g, 1.29 mmol) was reacted with <sup>13</sup>CD<sub>3</sub>I (0.47 g, 3.21 mmol) and hydrazine monohydrate (0.302g, 6.02mmol) to give **\*QDA** (0.37 g, 75%) as a white powder; mp 86.6-87.5 °C; <sup>1</sup>H NMR (500 MHz, CDCl<sub>3</sub>) δ 0.86 (t, *J* = 7.0 Hz, 3H, C(12)H<sub>3</sub>); 1.14-1.43 (m, 16H, C(3-11)H<sub>2</sub>); 1.74 (m, 2H, C(2)H<sub>2</sub>); 3.41 (d, *J* = 3.5 Hz, 3H, NCH<sub>3</sub>); 3.58 (m, 2H, C(1)H<sub>2</sub>); 3.92 (m, 2H, C(1')H<sub>2</sub>); 4.16 (m, 2H, C(2')H<sub>2</sub>); 5.91 (br. s, NH<sub>2</sub>); <sup>13</sup>C NMR (125 MHz, CDCl<sub>3</sub>) δ 14.3; 22.8; 23.1; 26.4; 29.4; 29.5; 29.6; 29.7; 29.8 (2 signals); 32.1; 51.6 (m); 52.2; 62.6; 66.0; 69.2; IR (DRIFT, KBr powder) 3278, 2913, 2850, 1468, 1173, 1048, 947 ν(O-N), 720, 482, 418 cm<sup>-1</sup>; HRMS *m/z* calcd [C<sub>15</sub><sup>13</sup>C<sup>2</sup>H<sub>3</sub>H<sub>34</sub>N<sub>2</sub>O]<sup>+</sup> 277.3119, observed 277.3124.

**Table S1.** Fraction of QDA adducts partitioned into *n*-butanol per extraction over five consecutive extractions

| Extraction                      | QDA-Pyruvate | QDA- $\alpha$ -Ketoglutarate | QDA- $\alpha$ -Ketobutyrate | QDA-Glucose |
|---------------------------------|--------------|------------------------------|-----------------------------|-------------|
| 1                               | 0.8334       | 0.8652                       | 0.8028                      | 0.9886      |
| 2                               | 0.1550       | 0.1180                       | 0.1957                      | 0.0109      |
| 3                               | 0.0022       | 0.0165                       | 0.0015                      | 0.0004      |
| 4                               | 0.0094       | 0.0003                       | 0.0000                      | 0.0000      |
| 5                               | 0.0000       | 0.0000                       | 0.0000                      | 0.0000      |
| Aqueous Layer (post extraction) | 0.0000       | 0.0000                       | 0.0000                      | 0.0001      |

**Table S1:** QDA-standard adducts were partitioned into *n*-butanol from 5 mM, pH 6 ammonium acetate buffer in 5 consecutive extraction. Ion counts used to calculate the partitioning fraction were normalized to external standard *N,N*-dimethyl-*N*-(2-((D<sub>6</sub>-propan-2-ylideneamino)oxy)ethyl)octan-1-aminium iodide.

**Table S2:** Reactive carbonyl metabolites assigned based on a comparison of the molecular formulae derived from QDA adducts with those from our custom database.

| Mass isomer assignments                                            | Molecular formula | Theoretical m/z for QDA adducts | Observed m/z | Mass difference | Ion count |
|--------------------------------------------------------------------|-------------------|---------------------------------|--------------|-----------------|-----------|
| Pyruvate<br>3-Oxopropanoate                                        | C3H4O3            | 343.295519                      | 343.295769   | 0.00025         | 905472.8  |
| Glyceraldehyde<br>1,3-Dihydroxyacetone                             | C3H6O3            | 345.311169                      | 345.311429   | 0.00026         | 100706.3  |
| 1-Amino-2-propanone<br>L-2-aminopropionaldehyde<br>3-Aminopropanal | C3H7NO            | 328.332238                      | 328.331509   | -0.000729       | 6147.6    |
| Dihydroxyacetone phosphate<br>Glyceraldehyde 3-phosphate           | C3H7O6P           | 425.277501                      | 425.277999   | 0.000498        | 36810.4   |
| Oxaloacetate                                                       | C4H4O5            | 387.285349                      | 387.285619   | 0.00027         | 2621.8    |
| 3-buten-2-one<br>(cis)-2-butenal                                   | C4H6O             | 325.321339                      | 325.321899   | 0.00056         | 3126.2    |
| isobutyraldehyde<br>2-butanone<br>1-Butanal                        | C4H8O             | 327.336989                      | 327.339649   | 0.00266         | 18593.2   |

|                                                                                                                                                                                                            |          |            |            |          |          |
|------------------------------------------------------------------------------------------------------------------------------------------------------------------------------------------------------------|----------|------------|------------|----------|----------|
| D-Erythrose<br>D-Threose<br>Erythrulose                                                                                                                                                                    | C4H8O4   | 375.321734 | 375.322089 | 0.000355 | 22845.9  |
| 2-amino-4-oxo-pentoate<br>Glutamate-1-<br>semialdehyde<br>L-glutamate $\gamma$ -<br>semialdehyde<br>Amino-oxo-pentanoate                                                                                   | C5H9NO3  | 386.337718 | 386.338069 | 0.000351 | 33337.8  |
| Deoxyribose<br>1-deoxy-xylulose<br>2-Deoxy- $\alpha$ -D-<br>ribofuranose<br>2-Deoxy-L-arabinose                                                                                                            | C5H10O4  | 389.337384 | 389.337689 | 0.000305 | 8659.2   |
| $\alpha$ -Ketoglutarate<br>Oxaloacetate 4-methyl<br>ester<br>Methyloxaloacetate<br>acetonedicarboxylate<br>5-Hydroxy-2,4-<br>dioxopentanoate<br>Dehydro-D-arabinono-<br>1,4-lactone<br>D-erythro-ascorbate | C5H6O5   | 401.300999 | 401.301469 | 0.00047  | 193346.3 |
| Dehydrodeoxypentona<br>te D-xylono-1,5-lactone<br>D-arabinono-1,4-lactone<br>L-arabinono-1,4-lactone                                                                                                       | C5H8O5   | 403.316649 | 403.317199 | 0.00055  | 2301.5   |
| Indole-5,6-quinone<br>Isatin                                                                                                                                                                               | C8H5NO2  | 402.311503 | 402.311999 | 0.000496 | 7508.5   |
| (2E)-4-hydroxy-5-<br>methyl-2-propylidene-<br>3(2H)-furanone                                                                                                                                               | C8H10O3  | 409.342469 | 409.341009 | -0.00146 | 1746.4   |
| 1,2-Dihydroxy-5-<br>(methylthio)pent-1-en-3-<br>one<br>2-oxo-5-<br>methylthiopentanoate                                                                                                                    | C6H10O3S | 417.314539 | 417.315089 | 0.00055  | 1541.8   |
| L-fuculose<br>Rhamnose<br>L-rhamnofuranose<br>fucose<br>1-O-methyl- $\beta$ -D-<br>xylofuranose<br>Deoxy-D-glucose<br>Deoxy-L-galactose<br>1,5-Anhydroglucitol                                             | C6H12O5  | 419.347949 | 419.348329 | 0.00038  | 10340.3  |

|                                                                                                                                                                                                                                                                                                                                                                                                         |           |            |            |          |               |
|---------------------------------------------------------------------------------------------------------------------------------------------------------------------------------------------------------------------------------------------------------------------------------------------------------------------------------------------------------------------------------------------------------|-----------|------------|------------|----------|---------------|
| D-galacto-Hexodialdose<br>5-Dehydro-D-fructose<br>2-keto-myo-inositol<br>L-sorbosone 2,6-lactone<br>D-galacto-hexodialdose<br>2-Deoxy-5-keto-D-<br>gluconic acid<br>L-sorbosone<br>Dehydrodeoxygluconate<br>L-sorbosone 1,4-lactone<br>Gulonolactone<br>Galactonolactone<br>Dehydrodeoxygalactona<br>te<br>Dehydroglucose<br>Gluconolactone<br>Dehydrogalactose<br>5-Deoxy glucuronic acid<br>2-Inosose | C6H10O6   | 433.327214 | 433.327769 | 0.000555 | 69951.5       |
| 5-Methylthio-D-ribose                                                                                                                                                                                                                                                                                                                                                                                   | C6H12O4S  | 435.325104 | 435.325029 | -7.5E-05 | 2982.9        |
| 9-Fluorenone                                                                                                                                                                                                                                                                                                                                                                                            | C13H8O    | 435.336989 | 435.337029 | 4E-05    | 18490.2       |
| Hexose (ketose and<br>aldose)                                                                                                                                                                                                                                                                                                                                                                           | C6H12O6   | 435.342864 | 435.343289 | 0.000425 | 3235226.<br>3 |
| Hydroxykynurenamine                                                                                                                                                                                                                                                                                                                                                                                     | C9H12N2O2 | 435.369352 | 435.370609 | 0.001257 | 1106.1        |
| oxo capric acid<br>methyl 9-oxononanoate<br>1,3S-dihydroxy-8E-<br>decen-5-one<br>Oxodecanoate                                                                                                                                                                                                                                                                                                           | C10H18O3  | 441.405069 | 441.405559 | 0.00049  | 16598.7       |
| Sedoheptulose<br>Mannoheptulopyranose                                                                                                                                                                                                                                                                                                                                                                   | C7H14O7   | 465.353429 | 465.353969 | 0.00054  | 10502.8       |
| oxo-dodecanoic acid                                                                                                                                                                                                                                                                                                                                                                                     | C12H22O3  | 469.436369 | 469.437049 | 0.00068  | 33371.2       |
| S-(3-oxo-3-carboxy-n-<br>propyl)cysteine                                                                                                                                                                                                                                                                                                                                                                | C7H11NO5S | 476.315268 | 476.316249 | 0.000981 | 1017.3        |
| N-Acetylhexosamine                                                                                                                                                                                                                                                                                                                                                                                      | C8H15NO6  | 476.369413 | 476.370119 | 0.000706 | 291404.4      |
| 5-isobutylthioribose                                                                                                                                                                                                                                                                                                                                                                                    | C9H18O4S  | 477.372054 | 477.373469 | 0.001415 | 77115.6       |
| Pyridoxal 5-phosphate                                                                                                                                                                                                                                                                                                                                                                                   | C8H10NO6P | 502.30405  | 502.304809 | 0.000759 | 69620.1       |
| Muramic acid                                                                                                                                                                                                                                                                                                                                                                                            | C9H17NO7  | 506.379978 | 506.380799 | 0.000821 | 3817.1        |
| Octadecenal                                                                                                                                                                                                                                                                                                                                                                                             | C18H34O   | 521.540439 | 521.541639 | 0.0012   | 1657.1        |
| Eicosanal                                                                                                                                                                                                                                                                                                                                                                                               | C20H40O   | 551.587389 | 551.588249 | 0.00086  | 26901.3       |

**Table S3:** Slopes, intercepts, and  $R^2$  values for the linear regressions of Figure S1 (below)

|           | *QDA-Pyr | *QDA- $\alpha$ Kg | *QDA- $\alpha$ Kb | *QDA-Glc |
|-----------|----------|-------------------|-------------------|----------|
| Slope     | 536847   | 579435            | 470851            | 265815   |
| Intercept | 813724   | 1523225           | 781273            | 488369   |
| $R^2$     | 0.974    | 0.924             | 0.969             | 0.960    |

**Figure S1:** Log-log scatter plot of concentration versus ion count (non-normalized) for four \*QDA standard adducts.  $\alpha$ Kg =  $\alpha$ -ketoglutarate; Pyr = pyruvate ;  $\alpha$ Kb = ketobutyrate; Glc = glucose.

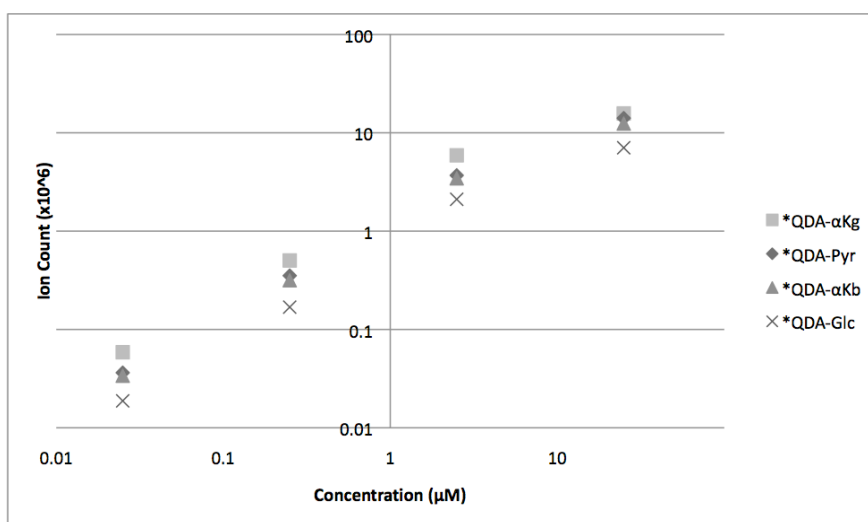

**Figure S2:** Scatter plot with linear regression of the normalized ion counts of QDA- $^{13}\text{C}_3$ -pyruvate from buffer sample (A) and cell extract sample (B) at three concentrations, averaged over three injections.

**Figure S2A**

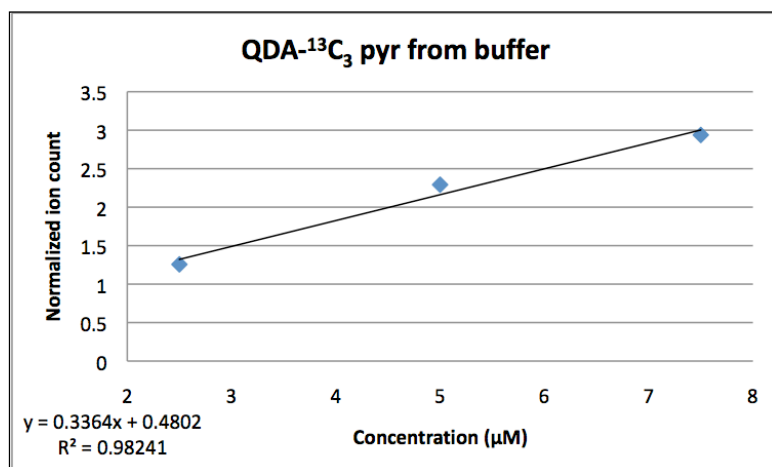

Figure S2B

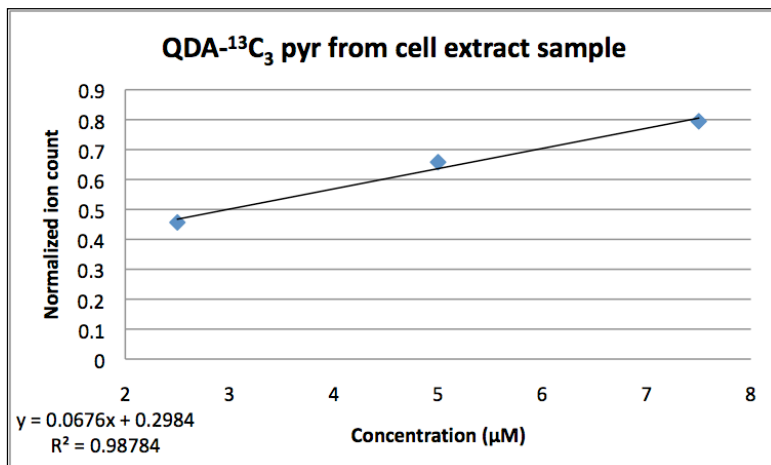



# NMR Spectra of QDA and \*QDA

**Spectrum 1:**  $^1\text{H}$  NMR spectrum QDA·I in  $\text{CDCl}_3$

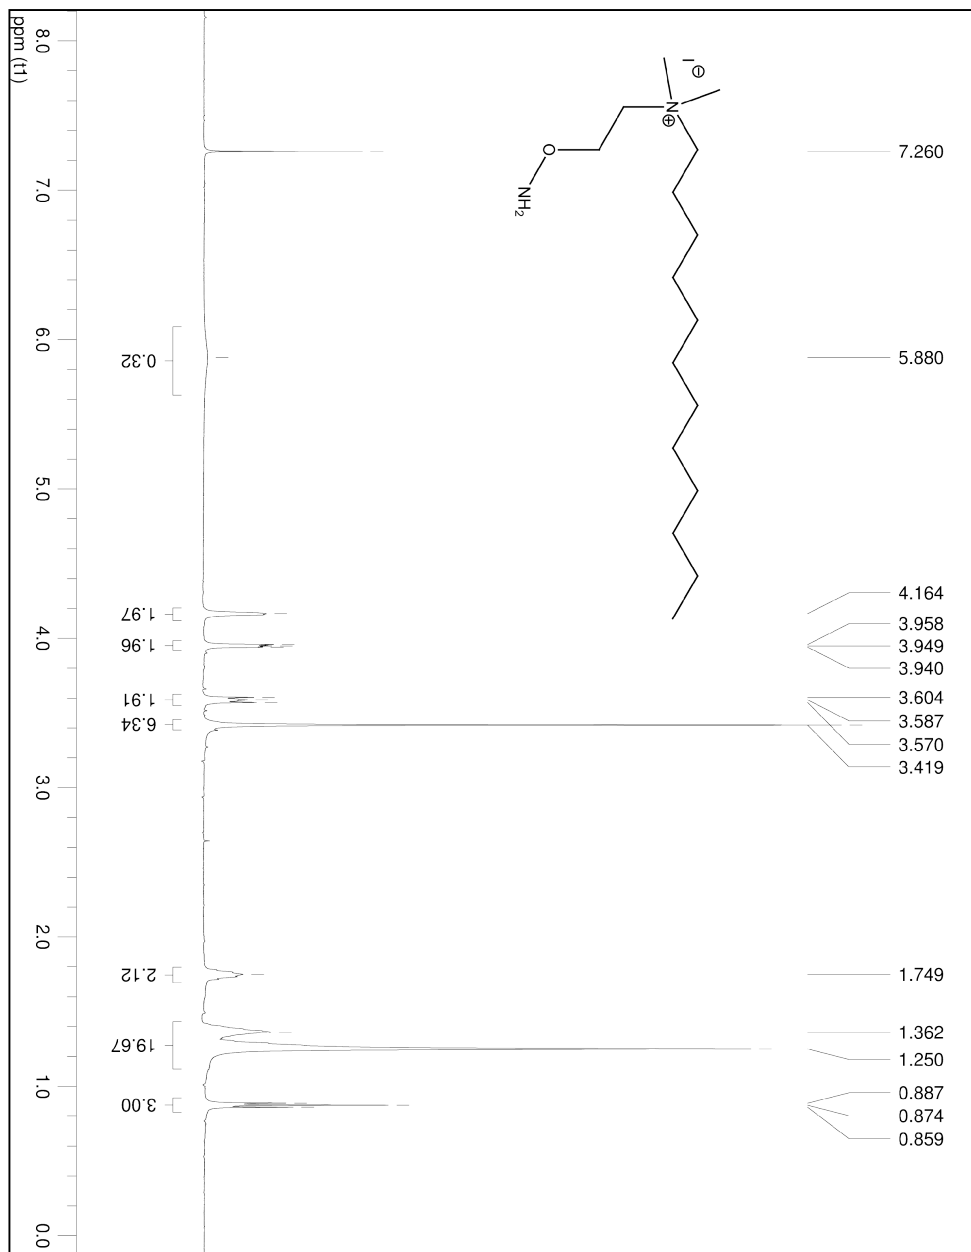

Spectrum 2:  $^{13}\text{C}$  NMR spectrum QDA·I in  $\text{CDCl}_3$

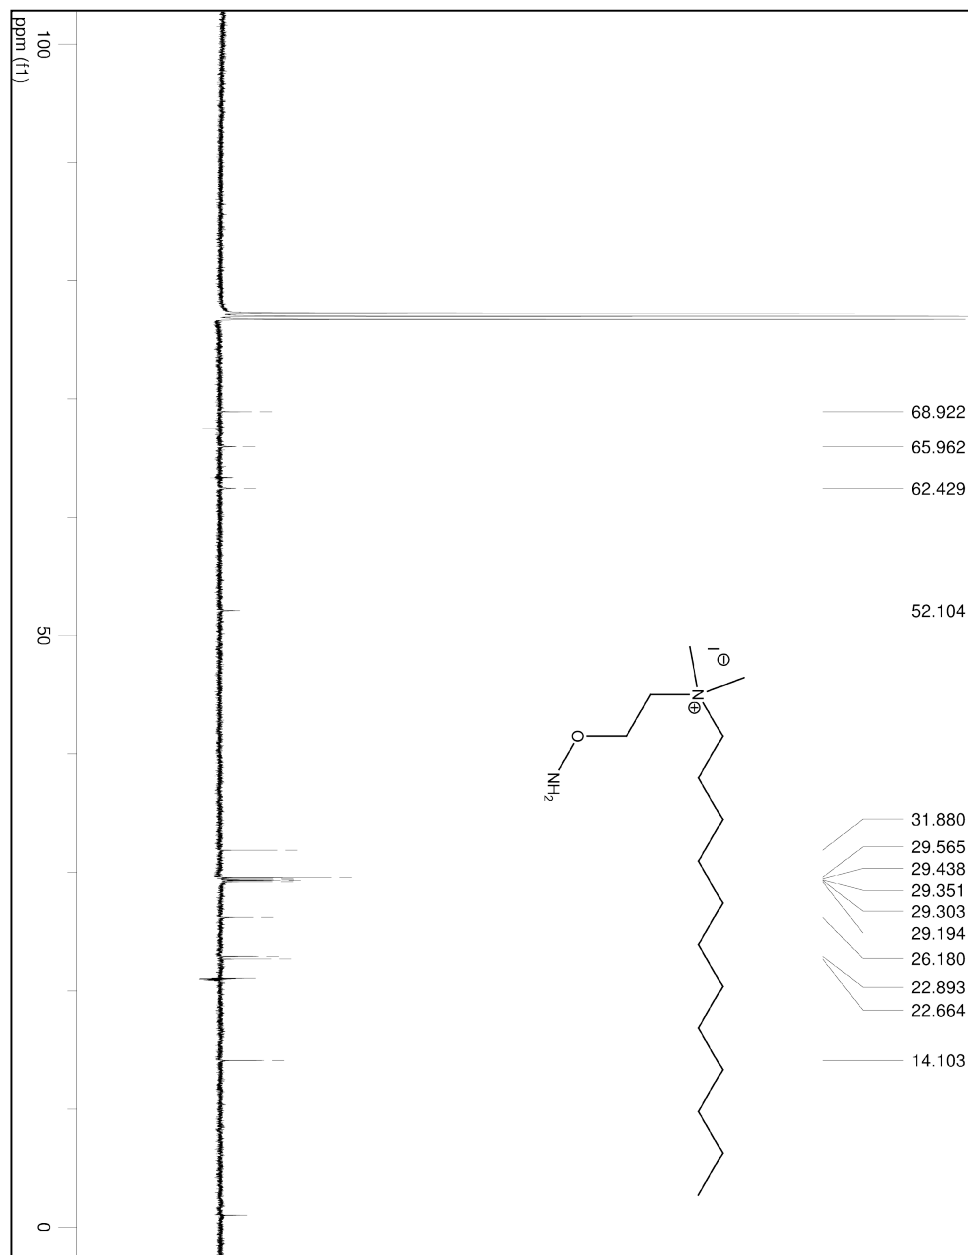

Spectrum 3:  $^1\text{H}$  NMR spectrum \*QDA-I in  $\text{CDCl}_3$

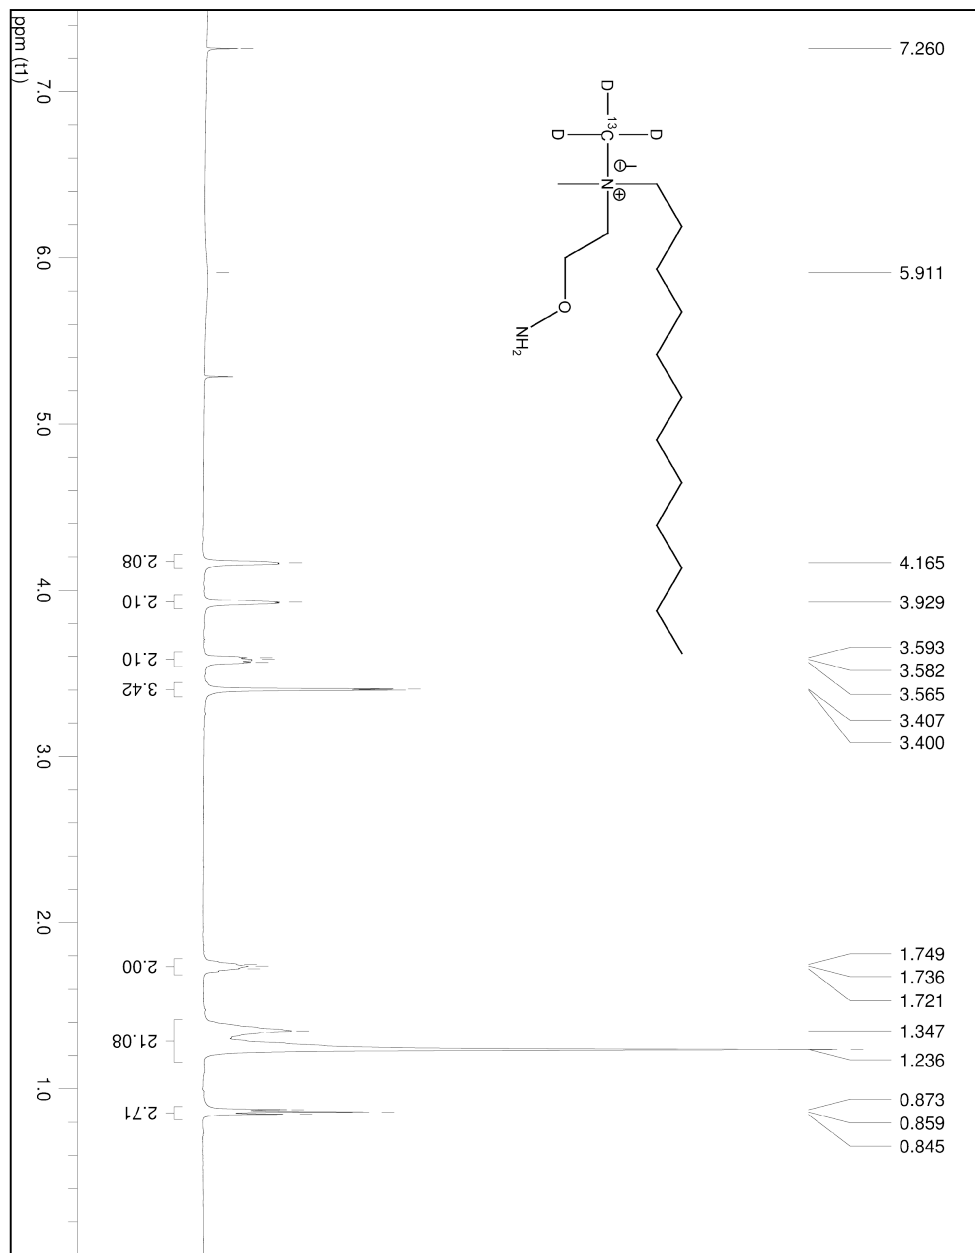

**Spectrum 4:**  $^{13}\text{C}$  NMR spectrum \*QDA-I in  $\text{CDCl}_3$

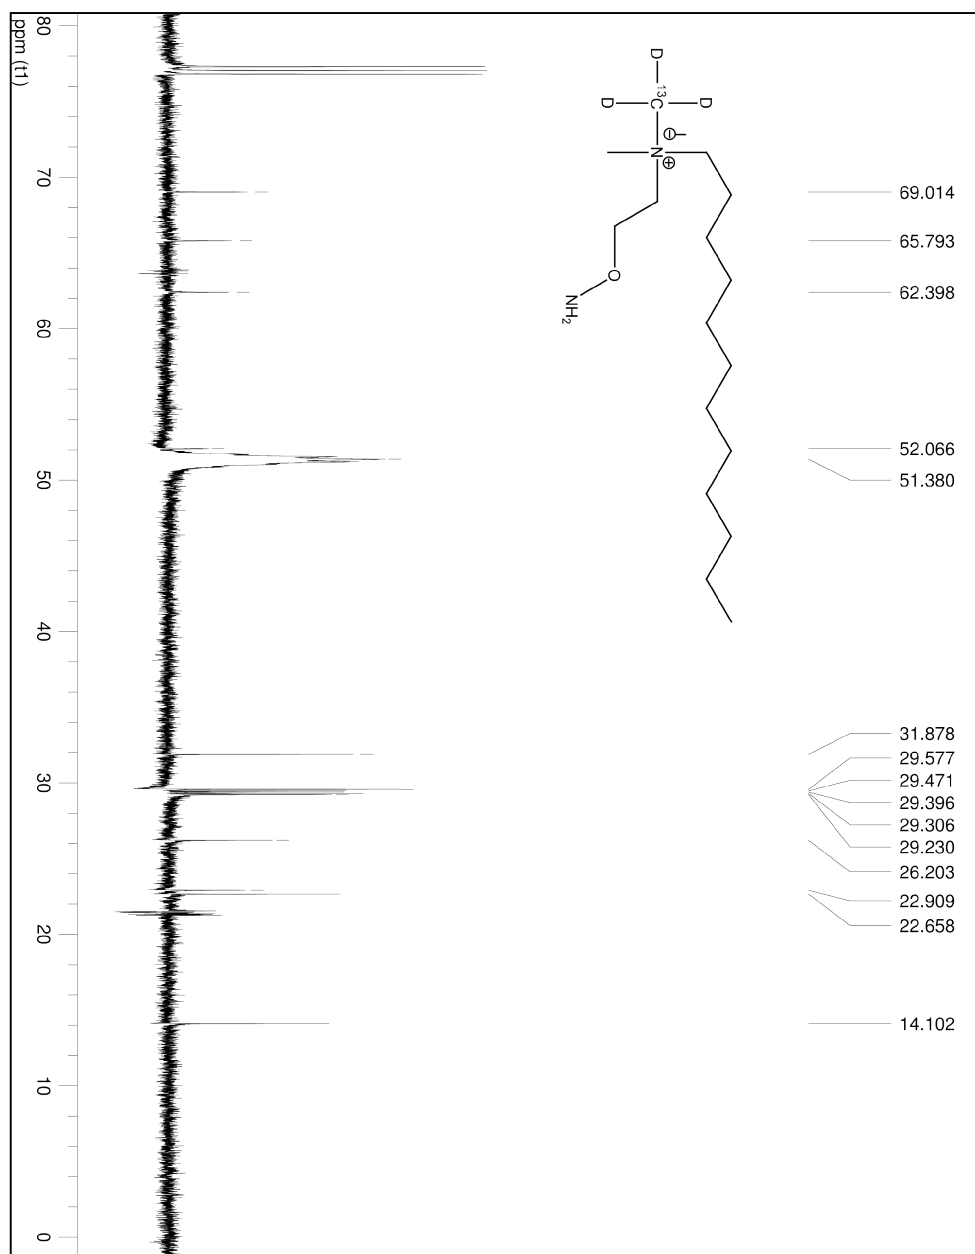

## References

1. Tsubone, K.; Uchida, N.; Niwase, H.; Honda, K., Syntheses of Sodium 2-(N-alkyl-N-methylamino)ethanephosphates and Their Physicochemical Properties. *Journal of the American Oil Chemists' Society* **1989**, *66* (6), 829-833.
2. Lane, A. N.; Fan, T. W.-M.; Xie, Z.; Moseley, H. N. B.; Higashi, R. M., Isotopomer analysis of lipid biosynthesis by high resolution mass spectrometry and NMR. *Analytica Chimica Acta* **2009**, *651*, 201-208.
